# Supplementary material for: GJD Modulates Cardiac/Vascular Inflammation and Decreases Blood Pressure in Hypertensive Rats
Source: Hindawi journal article supplement (doi:10.1155/2022/7345116), 2022-09-17
Supplement: f1 [file 7345116.f1.zip]

| Baseline | WKY    | SHR    | GJD-LD | GJD-MD | GJD-HD | CAP    | 1 week | WKY    | SHR    | GJD-LD | GJD-MD | GJD-HD | CAP    | 2 weeks | WKY    | SHR    | GJD-LD | GJD-MD | GJD-HD | CAP    | 3 weeks | WKY    | SHR    | GJD-LD | GJD-MD | GJD-HD | CAP    | 4 weeks | WKY    | SHR    | GJD-LD | GJD-MD | GJD-HD | CAP    | 5 weeks | WKY    | SHR    | GJD-LD | GJD-MD | GJD-HD | CAP    | 6 weeks | WKY    | SHR    | GJD-LD | GJD-MD | GJD-HD | CAP    |
|----------|--------|--------|--------|--------|--------|--------|--------|--------|--------|--------|--------|--------|--------|---------|--------|--------|--------|--------|--------|--------|---------|--------|--------|--------|--------|--------|--------|---------|--------|--------|--------|--------|--------|--------|---------|--------|--------|--------|--------|--------|--------|---------|--------|--------|--------|--------|--------|--------|
| 1        | 114    | 184    | 188    | 170    | 186    | 172    | 1      | 111    | 181    | 167    | 179    | 171    | 192    | 1       | 122    | 193    | 168    | 166    | 166    | 181    | 1       | 143    | 192    | 177    | 165    | 145    | 145    | 1       | 124    | 193    | 162    | 158    | 147    | 149    | 1       | 121    | 189    | 159    | 152    | 160    | 180    | 1       | 139    | 187    | 146    | 145    | 162    | 153    |
| 2        | 113    | 182    | 170    | 189    | 181    | 177    | 2      | 121    | 185    | 178    | 164    | 175    | 178    | 2       | 128    | 191    | 152    | 172    | 178    | 166    | 2       | 147    | 179    | 173    | 158    | 178    | 161    | 2       | 130    | 192    | 163    | 174    | 167    | 156    | 2       | 126    | 188    | 187    | 160    | 161    | 149    | 2       | 129    | 193    | 181    | 157    | 157    | 165    |
| 3        | 132    | 184    | 193    | 182    | 179    | 192    | 3      | 119    | 189    | 162    | 190    | 171    | 179    | 3       | 131    | 188    | 164    | 161    | 179    | 162    | 3       | 117    | 192    | 174    | 173    | 165    | 160    | 3       | 128    | 191    | 180    | 151    | 159    | 154    | 3       | 117    | 193    | 172    | 178    | 154    | 159    | 3       | 138    | 192    | 168    | 156    | 151    | 148    |
| 4        | 113    | 194    | 192    | 174    | 180    | 180    | 4      | 130    | 193    | 181    | 175    | 185    | 193    | 4       | 120    | 182    | 179    | 174    | 172    | 168    | 4       | 122    | 193    | 172    | 151    | 159    | 161    | 4       | 126    | 193    | 185    | 167    | 188    | 152    | 4       | 136    | 193    | 165    | 151    | 149    | 182    | 4       | 129    | 192    | 171    | 166    | 158    | 171    |
| 5        | 109    | 178    | 179    | 189    | 178    | 192    | 5      | 125    | 193    | 185    | 178    | 183    | 162    | 5       | 121    | 182    | 179    | 166    | 184    | 181    | 5       | 139    | 190    | 179    | 187    | 161    | 178    | 5       | 147    | 193    | 163    | 171    | 168    | 169    | 5       | 118    | 193    | 161    | 155    | 130    | 126    | 5       | 119    | 194    | 167    | 141    | 150    | 151    |
| 6        | 114    | 184    | 191    | 188    | 186    | 194    | 6      | 115    | 186    | 179    | 186    | 178    | 178    | 6       | 115    | 188    | 180    | 175    | 167    | 164    | 6       | 125    | 193    | 163    | 163    | 178    | 163    | 6       | 115    | 192    | 155    | 170    | 144    | 172    | 6       | 127    | 193    | 146    | 164    | 163    | 163    | 6       | 121    | 195    | 147    | 175    | 155    | 145    |
| 7        | 109    | 185    | 191    | 193    | 191    | 191    | 7      | 127    | 188    | 186    | 190    | 174    | 178    | 7       | 126    | 192    | 172    | 184    | 163    | 175    | 7       | 115    | 193    | 146    | 170    | 157    | 164    | 7       | 133    | 192    | 161    | 169    | 158    | 147    | 7       | 126    | 193    | 172    | 182    | 169    | 144    | 7       | 122    | 191    | 163    | 176    | 145    | 147    |
| Mean     | 114.65 | 184.56 | 186.31 | 183.53 | 182.36 | 185.70 | Mean   | 121.18 | 187.73 | 176.94 | 180.25 | 176.93 | 178.68 | Mean    | 123.26 | 188.12 | 170.57 | 171.05 | 171.34 | 170.99 | Mean    | 129.79 | 190.28 | 169.22 | 166.57 | 163.34 | 161.70 | Mean    | 129.11 | 192.79 | 167.94 | 164.46 | 161.44 | 157.12 | Mean    | 127.24 | 191.67 | 166.17 | 163.15 | 155.15 | 157.44 | Mean    | 128.34 | 191.79 | 163.45 | 159.40 | 153.84 | 154.26 |

| Baseline | WKY   | SHR    | GJD-LD | GJD-MD | GJD-HD | CAP    | 1 week | WKY   | SHR    | GJD-LD | GJD-MD | GJD-HD | CAP    | 2 weeks | WKY   | SHR    | GJD-LD | GJD-MD | GJD-HD | CAP    | 3 weeks | WKY   | SHR    | GJD-LD | GJD-MD | GJD-HD | CAP    | 4 weeks | WKY   | SHR    | GJD-LD | GJD-MD | GJD-HD | CAP    | 5 weeks | WKY   | SHR    | GJD-LD | GJD-MD | GJD-HD | CAP    | 6 weeks | WKY   | SHR    | GJD-LD | GJD-MD | GJD-HD | CAP    |
|----------|-------|--------|--------|--------|--------|--------|--------|-------|--------|--------|--------|--------|--------|---------|-------|--------|--------|--------|--------|--------|---------|-------|--------|--------|--------|--------|--------|---------|-------|--------|--------|--------|--------|--------|---------|-------|--------|--------|--------|--------|--------|---------|-------|--------|--------|--------|--------|--------|
| 1        | 82    | 134    | 146    | 135    | 146    | 131    | 1      | 83    | 134    | 120    | 131    | 133    | 143    | 1       | 85    | 147    | 127    | 132    | 122    | 139    | 1       | 107   | 141    | 126    | 115    | 115    | 111    | 1       | 89    | 148    | 121    | 127    | 108    | 120    | 1       | 87    | 138    | 123    | 115    | 121    | 135    | 1       | 104   | 144    | 114    | 110    | 131    | 113    |
| 2        | 89    | 135    | 119    | 140    | 137    | 137    | 2      | 91    | 131    | 134    | 120    | 128    | 126    | 2       | 95    | 137    | 119    | 125    | 137    | 126    | 2       | 106   | 130    | 112    | 113    | 128    | 117    | 2       | 86    | 143    | 133    | 131    | 125    | 118    | 2       | 95    | 147    | 132    | 114    | 127    | 118    | 2       | 92    | 146    | 138    | 113    | 129    | 125    |
| 3        | 101   | 140    | 122    | 135    | 136    | 139    | 3      | 90    | 138    | 115    | 141    | 135    | 119    | 3       | 94    | 142    | 123    | 107    | 131    | 124    | 3       | 84    | 127    | 126    | 127    | 124    | 110    | 3       | 96    | 144    | 134    | 109    | 119    | 114    | 3       | 102   | 137    | 129    | 139    | 115    | 124    | 3       | 99    | 138    | 133    | 112    | 112    | 107    |
| 4        | 85    | 143    | 141    | 140    | 118    | 136    | 4      | 99    | 133    | 129    | 131    | 139    | 133    | 4       | 91    | 136    | 143    | 123    | 128    | 120    | 4       | 93    | 143    | 137    | 106    | 118    | 121    | 4       | 92    | 140    | 130    | 124    | 143    | 123    | 4       | 98    | 142    | 121    | 116    | 115    | 137    | 4       | 98    | 144    | 126    | 124    | 120    | 132    |
| 5        | 82    | 136    | 137    | 142    | 127    | 136    | 5      | 91    | 143    | 125    | 123    | 134    | 126    | 5       | 93    | 131    | 131    | 132    | 133    | 125    | 5       | 100   | 136    | 126    | 130    | 116    | 124    | 5       | 111   | 136    | 113    | 129    | 121    | 120    | 5       | 92    | 149    | 115    | 129    | 109    | 92     | 5       | 91    | 153    | 123    | 110    | 113    | 117    |
| 6        | 87    | 130    | 135    | 142    | 153    | 139    | 6      | 85    | 136    | 127    | 124    | 127    | 121    | 6       | 79    | 143    | 125    | 134    | 129    | 120    | 6       | 96    | 144    | 117    | 114    | 125    | 120    | 6       | 87    | 146    | 116    | 120    | 96     | 128    | 6       | 91    | 147    | 115    | 122    | 120    | 114    | 6       | 87    | 143    | 114    | 133    | 115    | 105    |
| 7        | 81    | 152    | 131    | 136    | 142    | 136    | 7      | 94    | 144    | 135    | 137    | 129    | 138    | 7       | 98    | 142    | 130    | 134    | 126    | 128    | 7       | 86    | 147    | 102    | 124    | 123    | 122    | 7       | 102   | 141    | 130    | 122    | 125    | 134    | 7       | 94    | 137    | 133    | 132    | 123    | 109    | 7       | 90    | 140    | 120    | 132    | 105    | 113    |
| Mean     | 86.88 | 135.72 | 133.09 | 138.49 | 136.31 | 136.42 | Mean   | 90.35 | 136.99 | 126.52 | 129.69 | 132.09 | 129.38 | Mean    | 90.71 | 139.69 | 128.25 | 126.65 | 129.47 | 126.08 | Mean    | 96.00 | 138.31 | 120.97 | 118.48 | 121.11 | 117.76 | Mean    | 94.77 | 142.58 | 125.29 | 123.10 | 119.67 | 122.51 | Mean    | 94.20 | 142.36 | 124.01 | 123.84 | 118.74 | 118.47 | Mean    | 94.44 | 143.86 | 124.20 | 119.18 | 117.86 | 116.13 |

| Baseline | WKY    | SHR    | GJD-LD | GJD-MD | GJD-HD | CAP    | 1 week | WKY    | SHR    | GJD-LD | GJD-MD | GJD-HD | CAP    | 2 weeks | WKY    | SHR    | GJD-LD | GJD-MD | GJD-HD | CAP    | 3 weeks | WKY    | SHR    | GJD-LD | GJD-MD | GJD-HD | CAP    | 4 weeks | WKY    | SHR    | GJD-LD | GJD-MD | GJD-HD | CAP    | 5 weeks | WKY    | SHR    | GJD-LD | GJD-MD | GJD-HD | CAP    | 6 weeks | WKY    | SHR    | GJD-LD | GJD-MD | GJD-HD | CAP    |
|----------|--------|--------|--------|--------|--------|--------|--------|--------|--------|--------|--------|--------|--------|---------|--------|--------|--------|--------|--------|--------|---------|--------|--------|--------|--------|--------|--------|---------|--------|--------|--------|--------|--------|--------|---------|--------|--------|--------|--------|--------|--------|---------|--------|--------|--------|--------|--------|--------|
| 1        | 261.3  | 292.0  | 252.7  | 268.4  | 279.5  | 272.5  | 1      | 266.6  | 280.5  | 251.9  | 279.6  | 294.2  | 288.7  | 1       | 277.6  | 269.7  | 260.3  | 285.7  | 295.1  | 301.4  | 1       | 294.9  | 281.9  | 255.2  | 300.6  | 307.3  | 311.3  | 1       | 283.5  | 294.5  | 256.2  | 302.0  | 310.4  | 309.2  | 1       | 281.6  | 295.7  | 262.1  | 308.4  | 311.4  | 315.7  | 1       | 294.5  | 299.4  | 257.4  | 309.2  | 307.8  | 311.3  |
| 2        | 257.9  | 277.2  | 244.5  | 261.4  | 278.1  | 283.4  | 2      | 268.0  | 288.9  | 269.9  | 268.7  | 296.3  | 298.3  | 2       | 275.1  | 303.2  | 257.4  | 282.5  | 299.8  | 304.2  | 2       | 276.3  | 307.6  | 264.3  | 299.4  | 309.8  | 320.9  | 2       | 272.3  | 309.8  | 268.7  | 296.0  | 313.6  | 330.6  | 2       | 268.3  | 312.9  | 263.3  | 309.3  | 318.2  | 340.2  | 2       | 274.3  | 309.8  | 261.6  | 314.3  | 325.5  | 335.4  |
| 3        | 283.4  | 267.9  | 278.1  | 308.7  | 285.6  | 270.1  | 3      | 292.6  | 280.6  | 267.6  | 278.5  | 296.1  | 281.5  | 3       | 291.4  | 290.8  | 296.0  | 284.2  | 298.2  | 282.9  | 3       | 291.5  | 297.8  | 298.1  | 291.6  | 309.7  | 300.3  | 3       | 296.8  | 294.3  | 301.6  | 290.3  | 314.1  | 298.5  | 3       | 296.6  | 296.2  | 305.3  | 292.6  | 319.3  | 304.7  | 3       | 295.2  | 300.2  | 301.1  | 297.4  | 320.4  | 307.0  |
| 4        | 268.5  | 260.2  | 281.5  | 282.5  | 257.4  | 286.4  | 4      | 281.9  | 270.2  | 300.5  | 293.2  | 271.2  | 295.8  | 4       | 288.5  | 275.5  | 312.4  | 312.6  | 279.1  | 294.2  | 4       | 300.5  | 281.8  | 322.7  | 314.4  | 291.2  | 301.4  | 4       | 302.4  | 288.6  | 331.4  | 323.4  | 292.7  | 301.2  | 4       | 305.4  | 287.5  | 338.6  | 331.6  | 292.4  | 308.3  | 4       | 297.7  | 289.1  | 332.5  | 340.0  | 309.7  | 300.5  |
| 5        | 261.4  | 286.1  | 262.9  | 264.2  | 270.9  | 263.6  | 5      | 267.3  | 299.4  | 283.2  | 270.4  | 286.5  | 280.4  | 5       | 276.2  | 304.1  | 293.5  | 296.3  | 297.8  | 285.3  | 5       | 288.0  | 310.6  | 302.6  | 297.5  | 311.7  | 298.6  | 5       | 289.6  | 312.5  | 305.2  | 298.6  | 310.0  | 300.4  | 5       | 291.9  | 312.6  | 309.5  | 305.3  | 317.8  | 306.9  | 5       | 292.1  | 313.8  | 299.8  | 309.4  | 317.2  | 309.4  |
| 6        | 270.1  | 265.4  | 269.5  | 256.2  | 283.2  | 254.5  | 6      | 288.6  | 276.5  | 280.3  | 258.6  | 289.3  | 265.6  | 6       | 299.1  | 285.3  | 292.3  | 264.0  | 278.3  | 276.5  | 6       | 312.6  | 291.3  | 294.9  | 272.6  | 294.6  | 294.5  | 6       | 321.9  | 299.7  | 297.5  | 282.6  | 294.5  | 290.9  | 6       | 333.8  | 292.6  | 292.4  | 279.4  | 294.6  | 296.3  | 6       | 332.4  | 287.4  | 299.7  | 299.7  | 300.3  | 301.8  |
| 7        | 278.0  | 266.3  | 297.9  | 287.5  | 282.2  | 282.5  | 7      | 276.0  | 282.5  | 308.4  | 297.3  | 300.1  | 296.7  | 7       | 278.3  | 283.3  | 320.9  | 309.8  | 292.4  | 303.4  | 7       | 279.1  | 287.5  | 342.1  | 321.2  | 296.9  | 317.6  | 7       | 275.1  | 290.4  | 340.5  | 324.4  | 304.4  | 320.5  | 7       | 279.7  | 290.6  | 340.5  | 329.3  | 301.7  | 332.1  | 7       | 285.1  | 292.6  | 340.6  | 331.4  | 311.2  | 334.3  |
| Mean     | 266.66 | 273.59 | 269.59 | 269.84 | 276.70 | 273.29 | Mean   | 277.00 | 282.66 | 280.36 | 278.04 | 286.53 | 286.71 | Mean    | 285.74 | 287.41 | 290.40 | 289.38 | 291.53 | 292.56 | Mean    | 292.13 | 294.07 | 297.13 | 299.61 | 303.03 | 306.37 | Mean    | 291.66 | 296.54 | 300.16 | 302.47 | 306.81 | 307.30 | Mean    | 293.90 | 298.30 | 301.96 | 307.99 | 307.91 | 314.60 | Mean    | 295.50 | 298.90 | 299.24 | 311.77 | 313.16 | 314.24 |

|              |      |       |        |        |        |        |       |                |      |        |        |        |        |        |        |           |      |       |       |        |        |        |       |                |      |       |        |        |        |        |       |            |      |        |        |        |        |        |        |
|--------------|------|-------|--------|--------|--------|--------|-------|----------------|------|--------|--------|--------|--------|--------|--------|-----------|------|-------|-------|--------|--------|--------|-------|----------------|------|-------|--------|--------|--------|--------|-------|------------|------|--------|--------|--------|--------|--------|--------|
| Endothelin-1 | ng/L | WKY   | SHR    | GJD-LD | GJD-MD | GJD-HD | CAP   | Angiotensin II | ng/L | WKY    | SHR    | GJD-LD | GJD-MD | GJD-HD | CAP    | IL-1 beta | ng/L | WKY   | SHR   | GJD-LD | GJD-MD | GJD-HD | CAP   | Interleukin- 6 | ng/L | WKY   | SHR    | GJD-LD | GJD-MD | GJD-HD | CAP   | TNF- alpha | ng/L | WKY    | SHR    | GJD-LD | GJD-MD | GJD-HD | CAP    |
|              | 1    | 14.92 | 147.91 | 84.22  | 72.50  | 73.37  | 67.05 |                | 1    | 242.55 | 688.98 | 397.62 | 460.63 | 386.65 | 525.90 |           | 1    | 25.12 | 71.80 | 25.51  | 36.87  | 28.73  | 34.48 |                | 1    | 30.23 | 72.77  | 66.85  | 112.59 | 85.04  | 57.12 |            | 1    | 145.07 | 196.69 | 215.29 | 138.90 | 150.00 | 181.49 |
|              | 2    | 22.69 | 129.20 | 36.58  | 61.31  | 68.30  | 78.08 |                | 2    | 194.84 | 638.25 | 458.35 | 431.16 | 479.91 | 467.80 |           | 2    | 15.98 | 61.84 | 31.74  | 66.96  | 25.53  | 28.65 |                | 2    | 73.30 | 99.13  | 73.89  | 37.65  | 48.24  | 86.35 |            | 2    | 93.66  | 267.56 | 103.80 | 152.34 | 167.51 | 238.14 |
|              | 3    | 30.58 | 153.23 | 107.67 | 95.98  | 81.89  | 76.21 |                | 3    | 210.10 | 585.63 | 632.97 | 480.86 | 312.37 | 319.83 |           | 3    | 28.56 | 52.29 | 50.83  | 54.22  | 31.27  | 35.81 |                | 3    | 24.07 | 172.88 | 97.23  | 88.11  | 45.99  | 84.81 |            | 3    | 91.41  | 228.83 | 140.58 | 202.47 | 142.02 | 166.37 |
|              | 4    | 75.86 | 88.88  | 121.69 | 100.59 | 55.88  | 65.02 |                | 4    | 398.37 | 647.45 | 543.36 | 482.77 | 340.75 | 384.74 |           | 4    | 22.96 | 71.32 | 57.47  | 37.21  | 68.18  | 34.38 |                | 4    | 39.74 | 119.36 | 122.12 | 49.32  | 82.10  | 57.11 |            | 4    | 115.47 | 225.83 | 145.47 | 117.19 | 190.97 | 118.55 |
|              | 5    | 53.86 | 167.76 | 86.33  | 73.54  | 69.16  | 86.61 |                | 5    | 328.52 | 564.58 | 510.01 | 617.13 | 452.95 | 400.22 |           | 5    | 36.70 | 55.30 | 54.51  | 65.30  | 36.41  | 38.25 |                | 5    | 43.41 | 163.69 | 121.40 | 116.93 | 66.23  | 64.63 |            | 5    | 96.95  | 287.56 | 271.69 | 224.31 | 185.74 | 163.07 |
|              | 6    | 96.91 | 129.89 | 93.25  | 33.01  | 65.61  | 66.64 |                | 6    | 303.20 | 520.12 | 382.59 | 441.89 | 329.77 | 335.74 |           | 6    | 25.20 | 73.22 | 54.82  | 17.96  | 28.44  | 57.30 |                | 6    | 52.81 | 78.67  | 67.52  | 104.53 | 55.13  | 73.54 |            | 6    | 124.51 | 210.15 | 153.35 | 135.72 | 129.27 | 138.25 |
|              | 7    | 62.25 | 84.00  | 43.45  | 62.99  | 52.43  | 88.81 |                | 7    | 205.20 | 775.04 | 457.42 | 322.48 | 276.49 | 322.59 |           | 7    | 16.59 | 68.30 | 51.63  | 27.64  | 35.11  | 25.52 |                | 7    | 42.40 | 74.86  | 57.31  | 47.45  | 63.24  | 39.13 |            | 7    | 95.83  | 240.72 | 160.40 | 170.40 | 135.04 | 155.10 |
|              | Mean | 51.01 | 128.70 | 81.88  | 71.42  | 66.66  | 75.49 |                | Mean | 268.97 | 631.44 | 483.19 | 462.42 | 368.41 | 393.83 |           | Mean | 24.44 | 64.87 | 46.64  | 43.74  | 36.24  | 36.34 |                | Mean | 43.71 | 111.62 | 86.62  | 79.51  | 63.71  | 66.10 |            | Mean | 108.99 | 236.76 | 170.08 | 163.05 | 157.22 | 165.85 |

| Thoracic aorta Thickness(mm) | WKY     | SHR     | GJD-LD  | GJD-MD  | GJD-HD  | CAP     |
|------------------------------|---------|---------|---------|---------|---------|---------|
| 1                            | 0.11866 | 0.17535 | 0.15293 | 0.14168 | 0.12986 | 0.13146 |
| 2                            | 0.12121 | 0.18909 | 0.14489 | 0.14239 | 0.12395 | 0.12387 |
| 3                            | 0.11508 | 0.19033 | 0.14618 | 0.14294 | 0.13352 | 0.13445 |
| 4                            | 0.11756 | 0.18035 | 0.15373 | 0.14378 | 0.12666 | 0.13056 |
| 5                            | 0.12011 | 0.18849 | 0.14029 | 0.14449 | 0.12215 | 0.12297 |
| 6                            | 0.11478 | 0.19163 | 0.14448 | 0.14004 | 0.13132 | 0.13375 |
| 7                            | 0.11624 | 0.19099 | 0.15534 | 0.14113 | 0.13074 | 0.13132 |
| Mean                         | 0.11766 | 0.1866  | 0.14826 | 0.14235 | 0.12832 | 0.12977 |

|             |         |         |         |         |         |         |                |         |         |         |         |         |         |            |         |       |         |         |         |         |
|-------------|---------|---------|---------|---------|---------|---------|----------------|---------|---------|---------|---------|---------|---------|------------|---------|-------|---------|---------|---------|---------|
| IL-1 beta   | WKY     | SHR     | GJD-LD  | GJD-MD  | GJD-HD  | CAP     | Interleukin- 6 | WKY     | SHR     | GJD-LD  | GJD-MD  | GJD-HD  | CAP     | TNF- alpha | WKY     | SHR   | GJD-LD  | GJD-MD  | GJD-HD  | CAP     |
| 1           | 33413   | 58087   | 40113   | 44428   | 37019   | 40420   | 1              | 30721   | 44929   | 42586   | 62152   | 45546   | 45765   | 1          | 5227    | 19516 | 10430   | 14804   | 14571   | 9394    |
| 2           | 27941   | 57708   | 40655   | 38134   | 35310   | 40414   | 2              | 28120   | 46064   | 31922   | 55204   | 43237   | 39396   | 2          | 1677    | 17712 | 8804    | 17129   | 9414    | 7810    |
| 3           | 26091   | 66748   | 36593   | 41168   | 30390   | 38928   | 3              | 37848   | 49249   | 44219   | 46362   | 32340   | 38357   | 3          | 5463    | 16333 | 10781   | 10297   | 4642    | 10748   |
| 4           | 33335   | 52618   | 29616   | 44100   | 42068   | 36276   | 4              | 41583   | 44538   | 55408   | 51657   | 36439   | 36048   | 4          | 4428    | 11381 | 18583   | 11966   | 7134    | 11602   |
| 5           | 34957   | 65255   | 40372   | 42155   | 34513   | 34065   | 5              | 30231   | 64205   | 50661   | 46497   | 37780   | 45250   | 5          | 4360    | 10868 | 13215   | 9089    | 4920    | 6087    |
| 6           | 39644   | 63333   | 35284   | 32147   | 35915   | 35895   | 6              | 22282   | 55744   | 55089   | 45778   | 47436   | 39259   | 6          | 7273    | 13365 | 9436    | 9490    | 4818    | 8507    |
| 7           | 37560   | 65807   | 34941   | 31947   | 36041   | 27002   | 7              | 26213   | 58992   | 45605   | 44682   | 37339   | 32588   | 7          | 6777    | 12262 | 13651   | 16866   | 7116    | 10335   |
| Mean        | 33277.3 | 61365.1 | 36796.3 | 39154.1 | 35893.7 | 36142.9 | Mean           | 30999.7 | 51960.1 | 46498.6 | 50333.1 | 40016.7 | 39523.3 | Mean       | 5029.29 | 14491 | 12128.6 | 12805.9 | 7516.43 | 9211.86 |
| Collagen- I | WKY     | SHR     | GJD-LD  | GJD-MD  | GJD-HD  | CAP     | Collagen- III  | WKY     | SHR     | GJD-LD  | GJD-MD  | GJD-HD  | CAP     | alpha- SMA | WKY     | SHR   | GJD-LD  | GJD-MD  | GJD-HD  | CAP     |
| 1           | 1861    | 3918    | 2557    | 1302    | 1568    | 2617    | 1              | 14515   | 26729   | 16495   | 26212   | 22626   | 18408   | 1          | 8662    | 10752 | 12356   | 10136   | 8501    | 9554    |
| 2           | 715     | 5464    | 4144    | 4746    | 1238    | 2728    | 2              | 19040   | 31637   | 21817   | 18477   | 13083   | 20479   | 2          | 9684    | 17527 | 12262   | 10936   | 10213   | 10167   |
| 3           | 822     | 4022    | 1742    | 2071    | 1424    | 1077    | 3              | 10761   | 25967   | 20917   | 15514   | 15116   | 19039   | 3          | 6832    | 13165 | 10330   | 8608    | 9069    | 10153   |
| 4           | 699     | 2072    | 2389    | 2151    | 3078    | 1076    | 4              | 19039   | 23016   | 21086   | 15961   | 19060   | 16966   | 4          | 7369    | 14253 | 10963   | 9299    | 9656    | 6319    |
| 5           | 1056    | 2403    | 3433    | 1429    | 1147    | 1243    | 5              | 19607   | 26074   | 14159   | 18339   | 25319   | 20333   | 5          | 9025    | 17909 | 11633   | 8439    | 8514    | 7158    |
| 6           | 1266    | 2710    | 3077    | 1577    | 1876    | 1368    | 6              | 20151   | 23775   | 23508   | 16630   | 14686   | 17979   | 6          | 8672    | 13392 | 10615   | 7735    | 7271    | 8784    |
| 7           | 2441    | 3176    | 1157    | 2486    | 1820    | 1542    | 7              | 13667   | 18718   | 15644   | 16400   | 17927   | 20634   | 7          | 6239    | 13081 | 10073   | 8936    | 8212    | 9464    |
| Mean        | 1265.71 | 3395    | 2642.71 | 2251.71 | 1735.86 | 1664.43 | Mean           | 17185.5 | 26199.7 | 19663.7 | 18522.2 | 18315   | 18867.3 | Mean       | 8069    | 14297 | 11176   | 9155.57 | 8776.57 | 8799.86 |

|             |         |         |         |         |         |         |                |         |         |         |         |         |         |            |         |         |         |         |         |         |
|-------------|---------|---------|---------|---------|---------|---------|----------------|---------|---------|---------|---------|---------|---------|------------|---------|---------|---------|---------|---------|---------|
| IL-1 beta   | WKY     | SHR     | GJD-LD  | GJD-MD  | GJD-HD  | CAP     | Interleukin- 6 | WKY     | SHR     | GJD-LD  | GJD-MD  | GJD-HD  | CAP     | TNF- alpha | WKY     | SHR     | GJD-LD  | GJD-MD  | GJD-HD  | CAP     |
| 1           | 8406    | 19083   | 11036   | 5473    | 9766    | 8015    | 1              | 4315    | 5224    | 2212    | 3979    | 1795    | 1184    | 1          | 13023   | 20831   | 10318   | 7695    | 10423   | 13245   |
| 2           | 10244   | 17003   | 8340    | 9525    | 9056    | 6258    | 2              | 3309    | 2418    | 3464    | 3058    | 2473    | 1816    | 2          | 9593    | 25618   | 14460   | 11668   | 13690   | 10660   |
| 3           | 6641    | 16626   | 6194    | 8272    | 10318   | 9358    | 3              | 3373    | 4981    | 3116    | 3832    | 1763    | 897     | 3          | 6966    | 13916   | 17511   | 6415    | 10999   | 16275   |
| 4           | 5998    | 17492   | 12776   | 9752    | 10060   | 11327   | 4              | 359     | 5150    | 8002    | 2573    | 2961    | 3736    | 4          | 6134    | 16320   | 10809   | 17762   | 9446    | 10687   |
| 5           | 3263    | 22552   | 11451   | 5504    | 8393    | 10600   | 5              | 633     | 8211    | 3752    | 4441    | 2324    | 3066    | 5          | 5726    | 25207   | 12736   | 11438   | 12530   | 18804   |
| 6           | 6270    | 21505   | 9151    | 10601   | 7651    | 6339    | 6              | 390     | 9571    | 1511    | 1921    | 4002    | 2883    | 6          | 13243   | 11727   | 12785   | 13705   | 13385   | 9623    |
| 7           | 4151    | 24869   | 11028   | 9741    | 6272    | 10526   | 7              | 2477    | 9488    | 4150    | 3407    | 1125    | 2239    | 7          | 7379    | 21393   | 10138   | 14579   | 9613    | 7262    |
| Mean        | 6424.65 | 19875.5 | 9996.62 | 8409.71 | 8788.08 | 8917.56 | Mean           | 2122.43 | 6434.96 | 3744.06 | 3315.91 | 2348.99 | 2260.22 | Mean       | 8866.17 | 19287.6 | 12679.6 | 11894.6 | 11440.6 | 12365.2 |
| Collagen- I | WKY     | SHR     | GJD-LD  | GJD-MD  | GJD-HD  | CAP     | Collagen- III  | WKY     | SHR     | GJD-LD  | GJD-MD  | GJD-HD  | CAP     | alpha- SMA | WKY     | SHR     | GJD-LD  | GJD-MD  | GJD-HD  | CAP     |
| 1           | 7117    | 8238    | 7730    | 10063   | 6143    | 8739    | 1              | 20887   | 30118   | 16463   | 12562   | 7592    | 18922   | 1          | 38336   | 76405   | 52895   | 41851   | 37674   | 56795   |
| 2           | 3980    | 8258    | 5325    | 4027    | 5867    | 7785    | 2              | 6643    | 27111   | 14246   | 18112   | 16246   | 10798   | 2          | 24207   | 64980   | 44576   | 46606   | 33776   | 40186   |
| 3           | 4772    | 12629   | 6075    | 6512    | 7831    | 11340   | 3              | 20372   | 23575   | 12549   | 16540   | 10881   | 14467   | 3          | 33586   | 67049   | 49867   | 49673   | 48314   | 54765   |
| 4           | 9148    | 14782   | 6345    | 9625    | 4454    | 10419   | 4              | 5140    | 29637   | 16618   | 15690   | 7224    | 17974   | 4          | 43879   | 58565   | 45878   | 42039   | 54000   | 47873   |
| 5           | 5551    | 14410   | 9384    | 5815    | 7476    | 2351    | 5              | 20755   | 21268   | 17404   | 14229   | 20517   | 12961   | 5          | 49221   | 75380   | 68250   | 51160   | 44179   | 63083   |
| 6           | 3829    | 9373    | 6735    | 5011    | 8582    | 2489    | 6              | 10235   | 20251   | 18789   | 18197   | 15954   | 17644   | 6          | 47831   | 61169   | 47731   | 53495   | 46971   | 61499   |
| 7           | 3663    | 15091   | 6919    | 6469    | 4838    | 3848    | 7              | 8310    | 16035   | 23564   | 19482   | 20569   | 11058   | 7          | 30281   | 77772   | 53007   | 48638   | 56337   | 62105   |
| Mean        | 5437.25 | 11825.8 | 6930.51 | 6788.86 | 6455.94 | 6710.06 | Mean           | 13191.7 | 23999.1 | 17090.5 | 16401.7 | 14140.3 | 14832   | Mean       | 38191.7 | 68760   | 51743.4 | 47637.3 | 45893   | 55186.4 |

|       |      |      |        |        |        |      |         |      |      |        |        |        |      |       |      |      |        |        |        |      |
|-------|------|------|--------|--------|--------|------|---------|------|------|--------|--------|--------|------|-------|------|------|--------|--------|--------|------|
| IL-1β | WKY  | SHR  | GJD-LD | GJD-MD | GJD-HD | CAP  | Col-I   | WKY  | SHR  | GJD-LD | GJD-MD | GJD-HD | CAP  | TAK1  | WKY  | SHR  | GJD-LD | GJD-MD | GJD-HD | CAP  |
| 1     | 1.00 | 2.37 | 1.45   | 1.38   | 1.10   | 1.34 | 1       | 1.00 | 6.61 | 4.21   | 3.11   | 2.66   | 3.09 | 1     | 1.00 | 4.53 | 3.12   | 2.37   | 1.76   | 1.77 |
| 2     | 1.00 | 2.21 | 1.87   | 1.62   | 1.26   | 1.69 | 2       | 1.00 | 6.35 | 3.19   | 2.86   | 2.68   | 4.71 | 2     | 1.00 | 3.54 | 2.42   | 2.37   | 1.81   | 1.93 |
| 3     | 1.00 | 2.80 | 1.83   | 1.89   | 1.65   | 1.81 | 3       | 1.00 | 5.14 | 2.73   | 2.60   | 1.47   | 1.62 | 3     | 1.00 | 5.30 | 3.38   | 2.31   | 1.64   | 1.61 |
| Mean  | 1.00 | 2.46 | 1.72   | 1.63   | 1.34   | 1.61 | Mean    | 1.00 | 6.03 | 3.38   | 2.86   | 2.27   | 3.14 | Mean  | 1.00 | 4.46 | 2.97   | 2.35   | 1.74   | 1.77 |
| IL-6  | WKY  | SHR  | GJD-LD | GJD-MD | GJD-HD | CAP  | Col-III | WKY  | SHR  | GJD-LD | GJD-MD | GJD-HD | CAP  | IKB-α | WKY  | SHR  | GJD-LD | GJD-MD | GJD-HD | CAP  |
| 1     | 1.00 | 2.32 | 1.35   | 1.26   | 1.05   | 1.41 | 1       | 1.00 | 3.24 | 2.05   | 1.76   | 1.31   | 1.82 | 1     | 1.00 | 0.16 | 0.30   | 0.44   | 0.70   | 0.65 |
| 2     | 1.00 | 3.43 | 2.29   | 1.46   | 1.17   | 1.77 | 2       | 1.00 | 2.88 | 2.56   | 1.97   | 1.83   | 1.57 | 2     | 1.00 | 0.19 | 0.38   | 0.53   | 0.77   | 0.68 |
| 3     | 1.00 | 2.31 | 2.03   | 1.70   | 1.02   | 1.18 | 3       | 1.00 | 4.14 | 3.13   | 2.15   | 1.94   | 1.81 | 3     | 1.00 | 0.25 | 0.49   | 0.58   | 0.83   | 0.85 |
| Mean  | 1.00 | 2.69 | 1.89   | 1.47   | 1.08   | 1.45 | Mean    | 1.00 | 3.42 | 2.58   | 1.96   | 1.69   | 1.73 | Mean  | 1.00 | 0.20 | 0.39   | 0.52   | 0.77   | 0.73 |
| TNF-α | WKY  | SHR  | GJD-LD | GJD-MD | GJD-HD | CAP  | α-SMA   | WKY  | SHR  | GJD-LD | GJD-MD | GJD-HD | CAP  | p65   | WKY  | SHR  | GJD-LD | GJD-MD | GJD-HD | CAP  |
| 1     | 1.00 | 2.74 | 1.36   | 1.28   | 1.17   | 1.11 | 1       | 1.00 | 3.74 | 2.21   | 2.26   | 1.92   | 2.35 | 1     | 1.00 | 3.70 | 2.76   | 1.91   | 1.43   | 1.89 |
| 2     | 1.00 | 3.08 | 1.93   | 1.85   | 1.51   | 1.81 | 2       | 1.00 | 3.26 | 1.80   | 1.88   | 1.52   | 1.85 | 2     | 1.00 | 3.92 | 2.68   | 1.51   | 1.36   | 1.74 |
| 3     | 1.00 | 4.09 | 3.23   | 2.98   | 1.48   | 1.41 | 3       | 1.00 | 3.44 | 2.32   | 1.64   | 1.34   | 1.24 | 3     | 1.00 | 3.79 | 2.33   | 1.73   | 1.52   | 1.67 |
| Mean  | 1.00 | 3.31 | 2.18   | 2.04   | 1.39   | 1.44 | Mean    | 1.00 | 3.48 | 2.11   | 1.93   | 1.59   | 1.81 | Mean  | 1.00 | 3.80 | 2.59   | 1.72   | 1.43   | 1.77 |



| IL-1 $\beta$ | WKY  | SHR  | GJD-LD | GJD-MD | GJD-HD | CAP  |
|--------------|------|------|--------|--------|--------|------|
| 1            | 1.00 | 4.09 | 1.74   | 1.71   | 1.30   | 1.52 |
| 2            | 1.00 | 4.64 | 2.16   | 1.50   | 1.06   | 1.22 |
| 3            | 1.00 | 2.32 | 2.29   | 1.41   | 1.44   | 1.33 |
| Mean         | 1.00 | 3.68 | 2.06   | 1.54   | 1.27   | 1.36 |

| IL-6 | WKY  | SHR  | GJD-LD | GJD-MD | GJD-HD | CAP  |
|------|------|------|--------|--------|--------|------|
| 1    | 1.00 | 3.16 | 1.57   | 1.34   | 1.36   | 1.43 |
| 2    | 1.00 | 4.64 | 2.78   | 1.95   | 1.60   | 1.42 |
| 3    | 1.00 | 2.63 | 2.39   | 1.50   | 1.13   | 1.09 |
| Mean | 1.00 | 3.47 | 2.25   | 1.60   | 1.36   | 1.31 |

| TNF- $\alpha$ | WKY  | SHR  | GJD-LD | GJD-MD | GJD-HD | CAP  |
|---------------|------|------|--------|--------|--------|------|
| 1             | 1.00 | 2.82 | 2.62   | 2.48   | 1.98   | 1.70 |
| 2             | 1.00 | 3.04 | 2.16   | 1.66   | 1.47   | 1.56 |
| 3             | 1.00 | 3.00 | 2.34   | 1.79   | 1.28   | 1.66 |
| Mean          | 1.00 | 2.96 | 2.37   | 1.98   | 1.58   | 1.64 |

| Col-I | WKY  | SHR  | GJD-LD | GJD-MD | GJD-HD | CAP  |
|-------|------|------|--------|--------|--------|------|
| 1     | 1.00 | 3.84 | 2.37   | 1.87   | 1.53   | 1.60 |
| 2     | 1.00 | 4.60 | 2.03   | 2.04   | 1.77   | 1.65 |
| 3     | 1.00 | 3.27 | 1.77   | 2.00   | 1.82   | 1.78 |
| Mean  | 1.00 | 3.90 | 2.06   | 1.97   | 1.71   | 1.68 |

| Col-III | WKY  | SHR  | GJD-LD | GJD-MD | GJD-HD | CAP  |
|---------|------|------|--------|--------|--------|------|
| 1       | 1.00 | 2.16 | 1.68   | 1.67   | 1.34   | 1.33 |
| 2       | 1.00 | 2.81 | 2.31   | 2.06   | 1.63   | 1.80 |
| 3       | 1.00 | 3.00 | 1.96   | 1.99   | 1.77   | 1.78 |
| Mean    | 1.00 | 2.66 | 1.99   | 1.91   | 1.58   | 1.64 |

| $\alpha$ -SMA | WKY  | SHR  | GJD-LD | GJD-MD | GJD-HD | CAP  |
|---------------|------|------|--------|--------|--------|------|
| 1             | 1.00 | 2.34 | 1.63   | 1.45   | 1.09   | 1.45 |
| 2             | 1.00 | 2.52 | 1.75   | 1.50   | 1.43   | 1.56 |
| 3             | 1.00 | 2.55 | 1.78   | 1.79   | 1.53   | 1.90 |
| Mean          | 1.00 | 2.47 | 1.72   | 1.58   | 1.35   | 1.63 |

| TAK1 | WKY  | SHR  | GJD-LD | GJD-MD | GJD-HD | CAP  |
|------|------|------|--------|--------|--------|------|
| 1    | 1.00 | 3.06 | 2.24   | 2.02   | 1.78   | 1.72 |
| 2    | 1.00 | 4.06 | 3.10   | 2.16   | 1.75   | 1.83 |
| 3    | 1.00 | 4.29 | 2.41   | 1.72   | 1.39   | 1.43 |
| Mean | 1.00 | 3.80 | 2.58   | 1.97   | 1.64   | 1.66 |

| IKB- $\alpha$ | WKY  | SHR  | GJD-LD | GJD-MD | GJD-HD | CAP  |
|---------------|------|------|--------|--------|--------|------|
| 1             | 1.00 | 0.26 | 0.31   | 0.50   | 0.68   | 0.73 |
| 2             | 1.00 | 0.29 | 0.43   | 0.52   | 0.70   | 0.66 |
| 3             | 1.00 | 0.27 | 0.47   | 0.59   | 0.81   | 0.65 |
| Mean          | 1.00 | 0.27 | 0.40   | 0.54   | 0.73   | 0.68 |

| p65  | WKY  | SHR  | GJD-LD | GJD-MD | GJD-HD | CAP  |
|------|------|------|--------|--------|--------|------|
| 1    | 1.00 | 3.16 | 2.56   | 1.93   | 1.65   | 1.76 |
| 2    | 1.00 | 3.06 | 2.45   | 2.03   | 1.54   | 1.57 |
| 3    | 1.00 | 3.25 | 2.11   | 1.97   | 1.53   | 1.80 |
| Mean | 1.00 | 3.16 | 2.38   | 1.98   | 1.57   | 1.71 |

|            |         |         |         |         |         |         |
|------------|---------|---------|---------|---------|---------|---------|
| TAK1       | WKY     | SHR     | GJD-LD  | GJD-MD  | GJD-HD  | CAP     |
| 1          | 0.13214 | 0.99679 | 0.53621 | 0.36033 | 0.2582  | 0.27792 |
| 2          | 0.07813 | 0.60849 | 0.52202 | 0.41905 | 0.27321 | 0.27014 |
| 3          | 0.07195 | 0.71892 | 0.55067 | 0.35044 | 0.2214  | 0.2291  |
| Mean       | 0.09407 | 0.77473 | 0.5363  | 0.37661 | 0.25094 | 0.25906 |
| P65        | WKY     | SHR     | GJD-LD  | GJD-MD  | GJD-HD  | CAP     |
| 1          | 0.27645 | 1.29641 | 0.94451 | 0.83884 | 0.69089 | 0.68922 |
| 2          | 0.06884 | 1.03719 | 0.79232 | 0.48621 | 0.42357 | 0.42147 |
| 3          | 0.07233 | 0.90697 | 0.58418 | 0.42507 | 0.18554 | 0.18703 |
| Mean       | 0.1392  | 1.08019 | 0.77367 | 0.58337 | 0.43333 | 0.43257 |
| IKB- alpha | WKY     | SHR     | GJD-LD  | GJD-MD  | GJD-HD  | CAP     |
| 1          | 1.00208 | 0.17246 | 0.28046 | 0.44219 | 0.67323 | 0.6941  |
| 2          | 1.06062 | 0.11662 | 0.16852 | 0.21964 | 0.42195 | 0.44269 |
| 3          | 0.8457  | 0.07187 | 0.12645 | 0.20401 | 0.39296 | 0.39445 |
| Mean       | 0.96947 | 0.12032 | 0.19181 | 0.28861 | 0.49605 | 0.51041 |

|            |         |         |         |         |         |         |
|------------|---------|---------|---------|---------|---------|---------|
| TAK1       | WKY     | SHR     | GJD-LD  | GJD-MD  | GJD-HD  | CAP     |
| 1          | 0.08891 | 0.58291 | 0.43787 | 0.29306 | 0.17181 | 0.16042 |
| 2          | 0.12973 | 0.96037 | 0.64012 | 0.39541 | 0.22179 | 0.21477 |
| 3          | 0.13161 | 0.69889 | 0.47029 | 0.34315 | 0.23355 | 0.2476  |
| Mean       | 0.11675 | 0.74739 | 0.51609 | 0.34388 | 0.20905 | 0.2076  |
| P65        | WKY     | SHR     | GJD-LD  | GJD-MD  | GJD-HD  | CAP     |
| 1          | 0.12717 | 0.98544 | 0.82948 | 0.75743 | 0.39841 | 0.37612 |
| 2          | 0.2864  | 0.95156 | 0.75671 | 0.54188 | 0.4538  | 0.44445 |
| 3          | 0.23207 | 0.74242 | 0.5928  | 0.43986 | 0.32497 | 0.32154 |
| Mean       | 0.21521 | 0.89314 | 0.72633 | 0.57973 | 0.39239 | 0.3807  |
| IKB- alpha | WKY     | SHR     | GJD-LD  | GJD-MD  | GJD-HD  | CAP     |
| 1          | 1.19362 | 0.18859 | 0.38359 | 0.64639 | 0.79263 | 0.811   |
| 2          | 0.99572 | 0.26914 | 0.42645 | 0.60038 | 0.75865 | 0.77323 |
| 3          | 1.20005 | 0.11449 | 0.22735 | 0.43717 | 0.69298 | 0.71098 |
| Mean       | 1.1298  | 0.19074 | 0.3458  | 0.56131 | 0.74809 | 0.76507 |
