# Supplementary material for: GJD Modulates Cardiac/Vascular Inflammation and Decreases Blood Pressure in Hypertensive Rats
Source: Hindawi journal article supplement (doi:10.1155/2022/7345116), 2022-09-17

---

Heart Western Blot:

TAK1

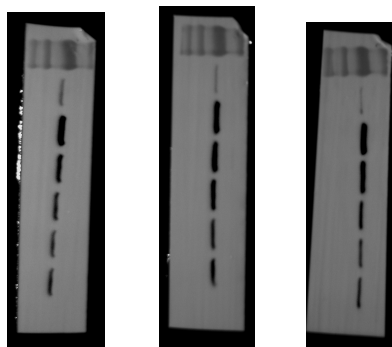

IKB- alpha

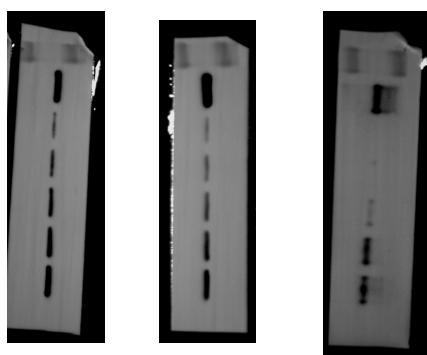

P65

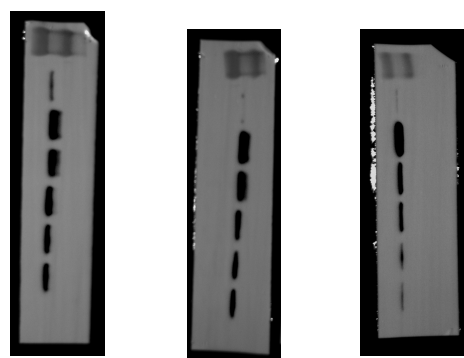

beta-actin

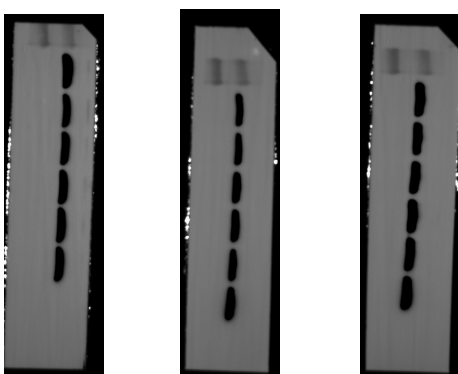

---

Thoracic aorta Western Blot:

TAK1

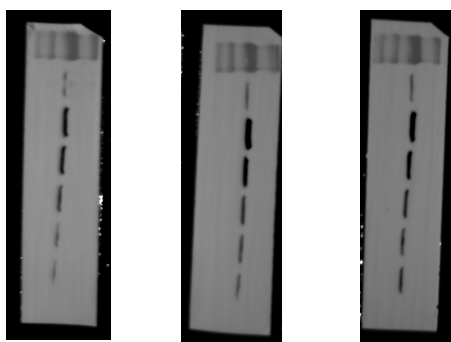

IKB- alpha

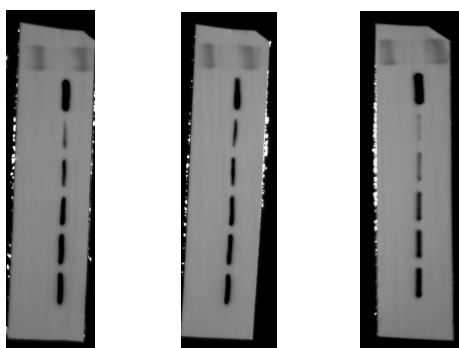

P65

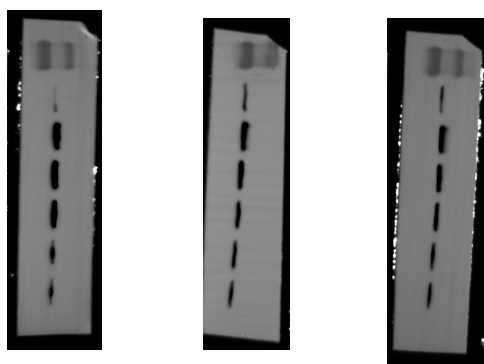

beta-actin

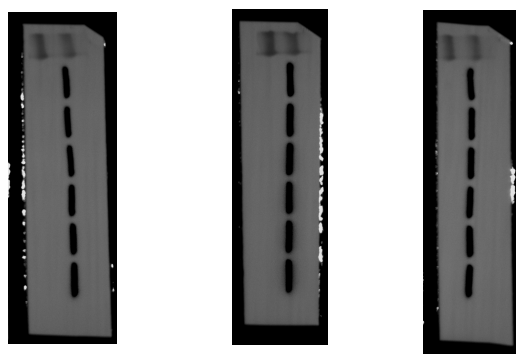

Supplement: f1 [file 7345116.f1.zip]
